# Supplementary material
Source: Springer Nature journal article supplement (https://www.springermedizin.de/resource/supplementary/12875_2006_225_MOESM3_ESM.pdf/9436542)

**a) All funding recipients (n=34):**

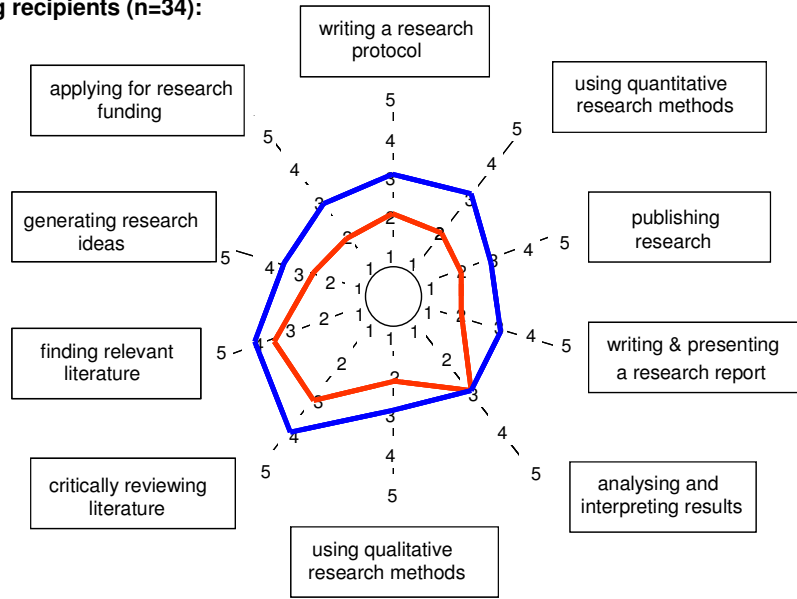

**c) Writing grant holders (n=10):**

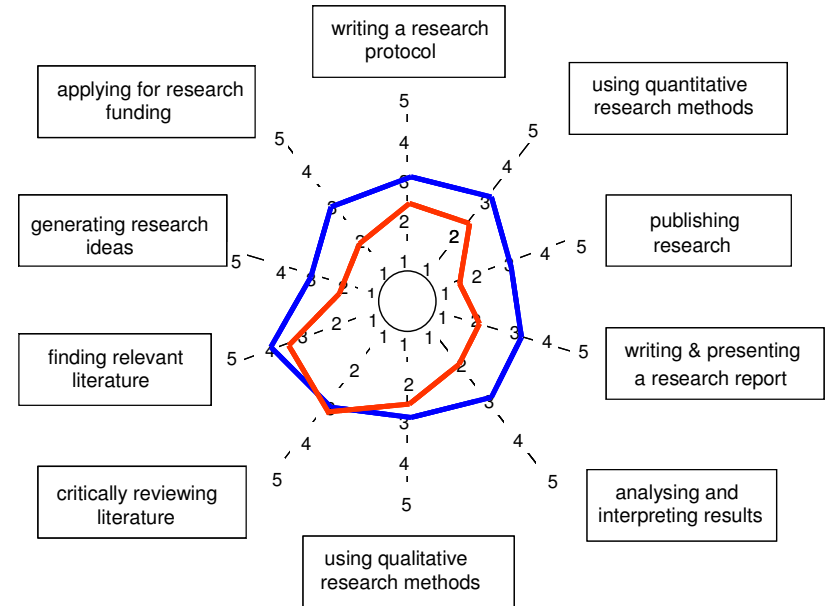

■ Research experience PRIOR to funded activity      1 = no experience  
■ Research experience AFTER completion of funded activity      5 = very experienced

**b) Bursary holders (n=21):**

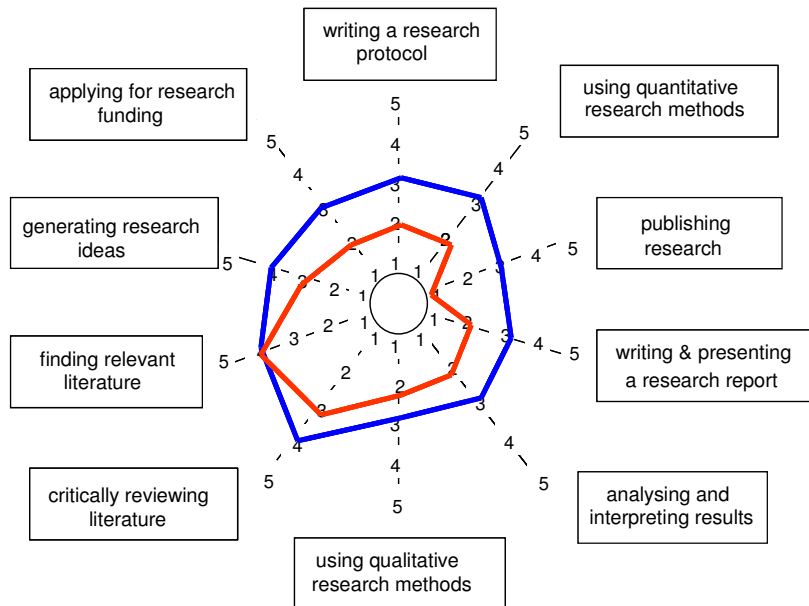

**d) Research fellows (n=3):**

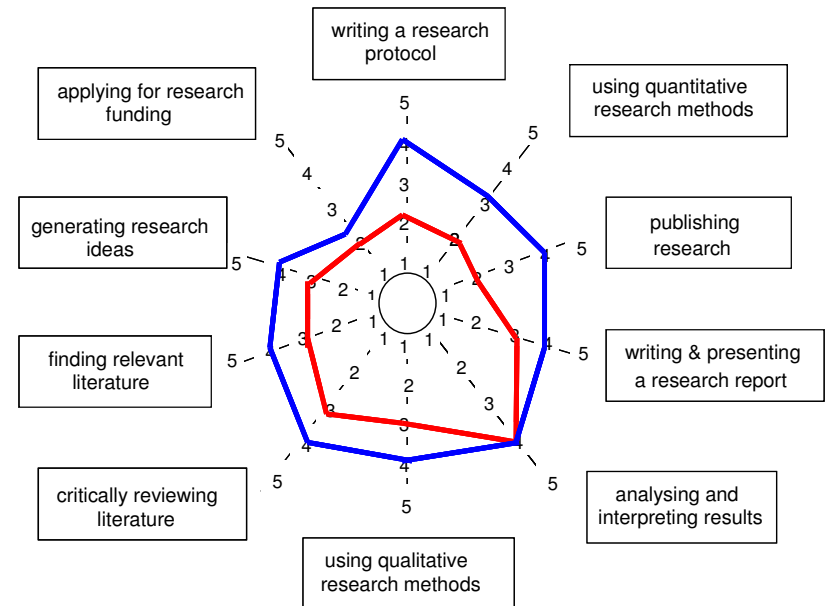

Supplement: MOESM3 [file 9436542]
